# Supplementary material
Source: Copernicus journal article supplement (doi:10.5194/ar-4-265-2026)
Supplement: Supplementary file 1 [file ar-4-265-2026-supplement.pdf]

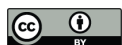

*Supplement of*

## **Nascent titanium-/silicon-containing particle formation in corona-discharge-assisted combustion**

**Chanakya Bagya Ramesh et al.**

*Correspondence to:* Yang Wang ([yangwang@miami.com](mailto:yangwang@miami.com))

The copyright of individual parts of the supplement might differ from the article licence.

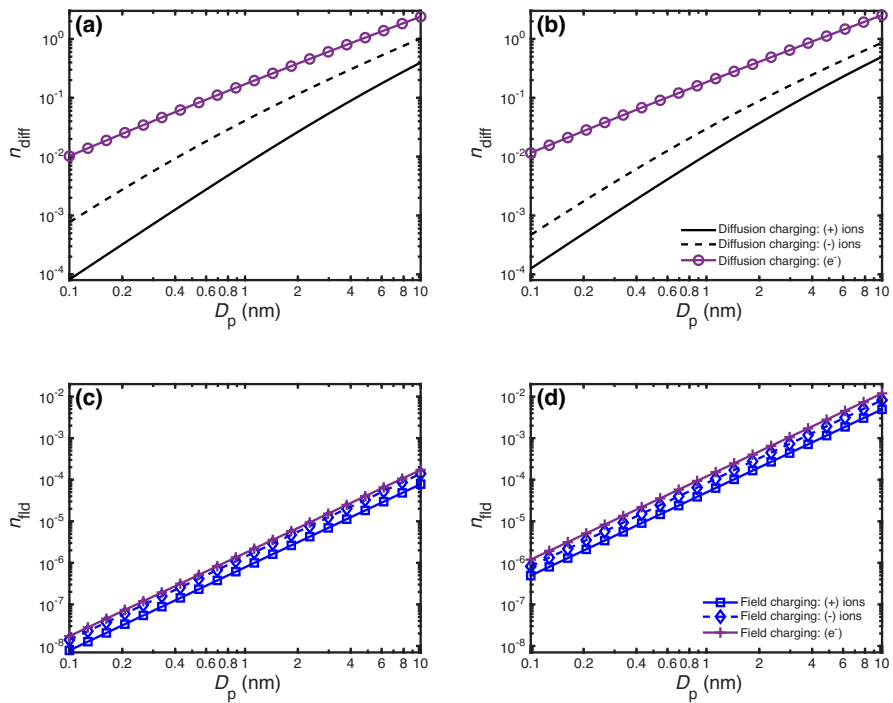

Figure S1: Shows the charge acquired by  $\text{SiO}_2$  particles with a dielectric constant of 3.9; (a) Diffusion charging in flame only condition; (b) Diffusion charging in PAC with a plasma power of 125 W; (c) Field charging in flame only condition; (d) Field charging in PAC with a plasma power of 125 W.

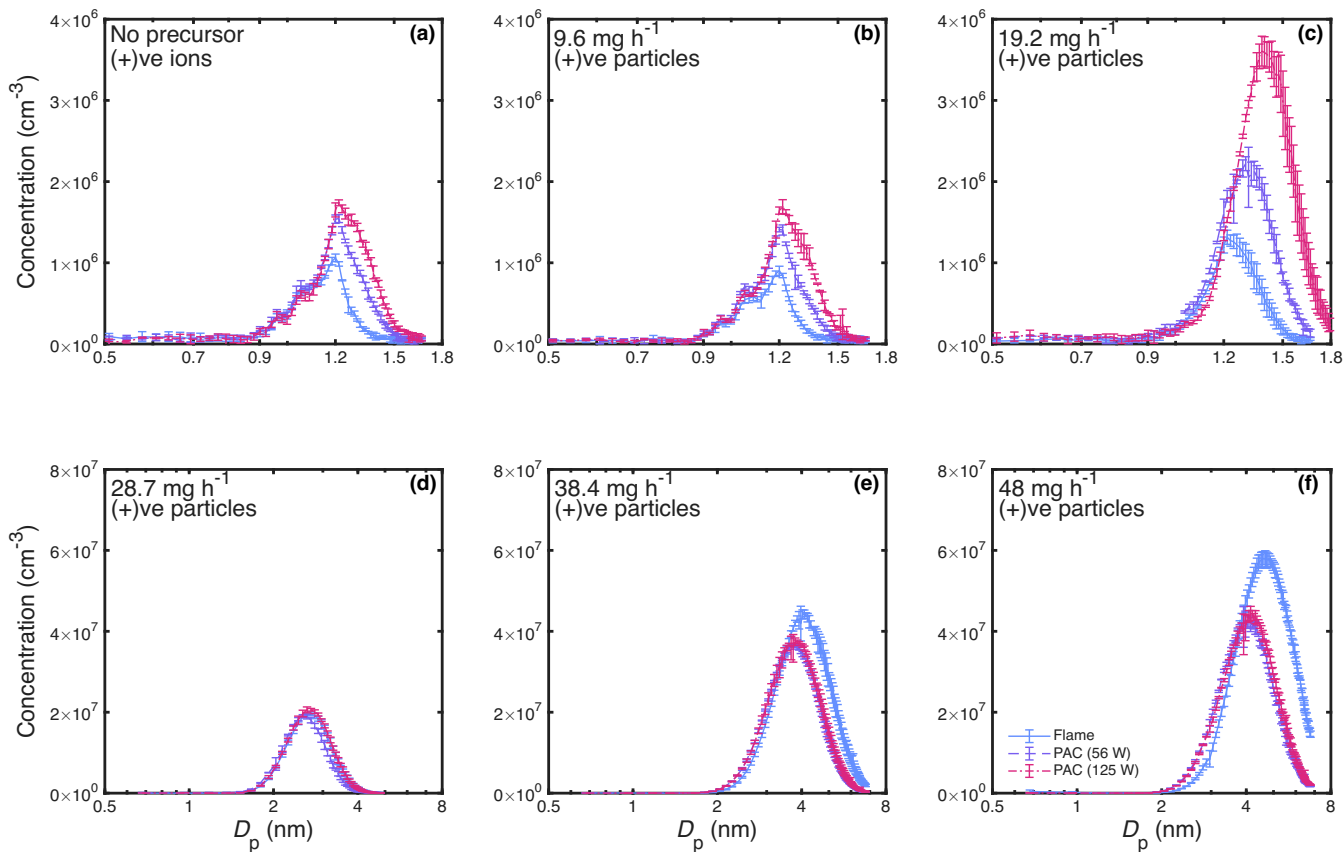

10 **Figure S2: (a) The size distribution of positive ions without any TTIP; (b), (c), (d), (e), and (f) are the size distribution of positively charged Ti-containing clusters with TTIP feed rates ranging from of 9.6 mg h<sup>-1</sup> to 48 mg h<sup>-1</sup>. Each panel compares the influence of corona discharge at power 56 W and 125 W on the size distribution. Error bars denote the standard deviation. Size distributions showed in this plot are not corrected for charged fraction.**

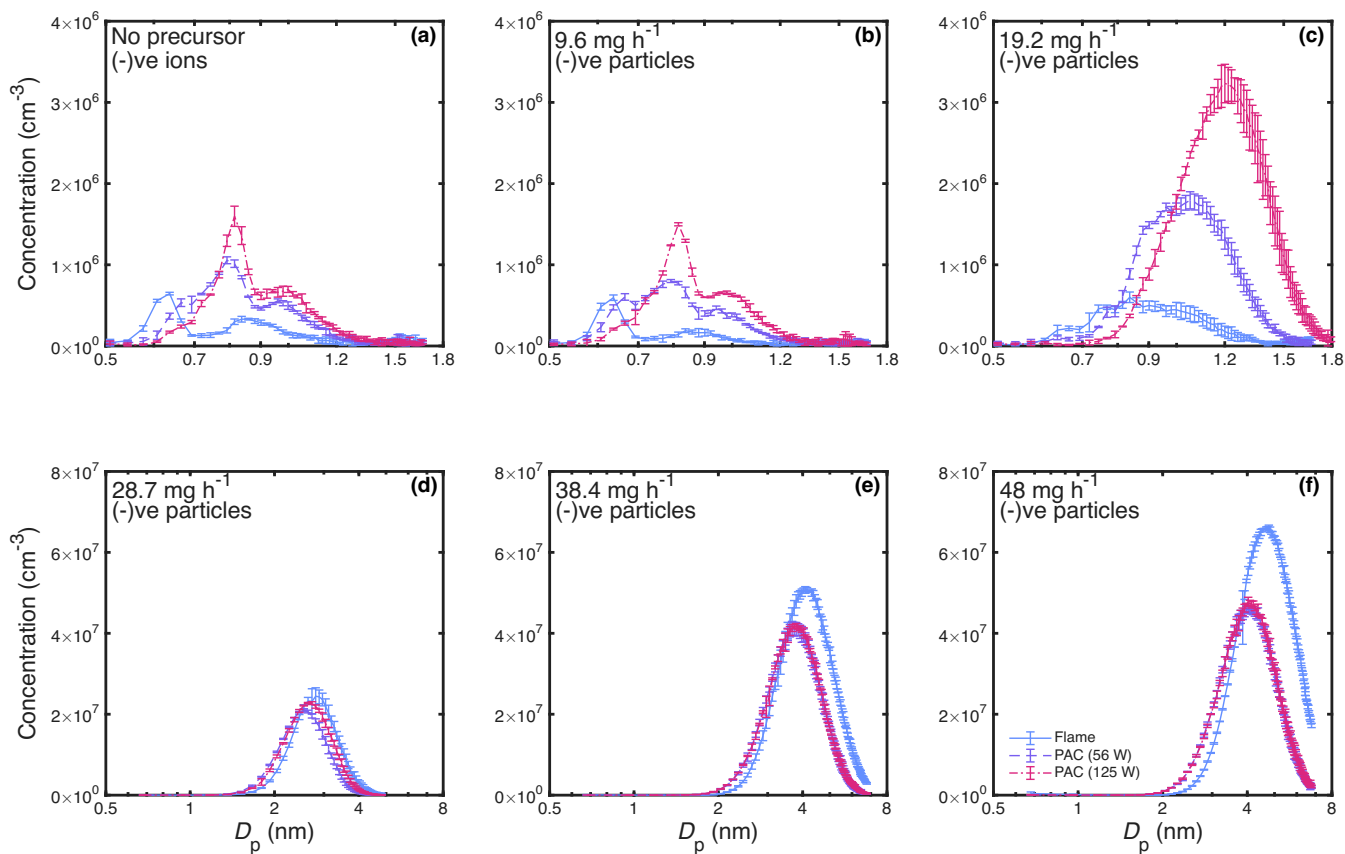

15 **Figure S3: (a) The size distribution of negative ions without any TTIP; (b), (c), (d), (e), and (f) are the size distribution of negatively charged Ti-containing clusters with TTIP feed rates ranging from of 9.6 mg h<sup>-1</sup> to 48 mg h<sup>-1</sup>. Each panel compares the influence of corona discharge at power 56 W and 125 W on the size distribution. Error bars denote the standard deviation. Size distributions showed in this plot are not corrected for charged fraction.**

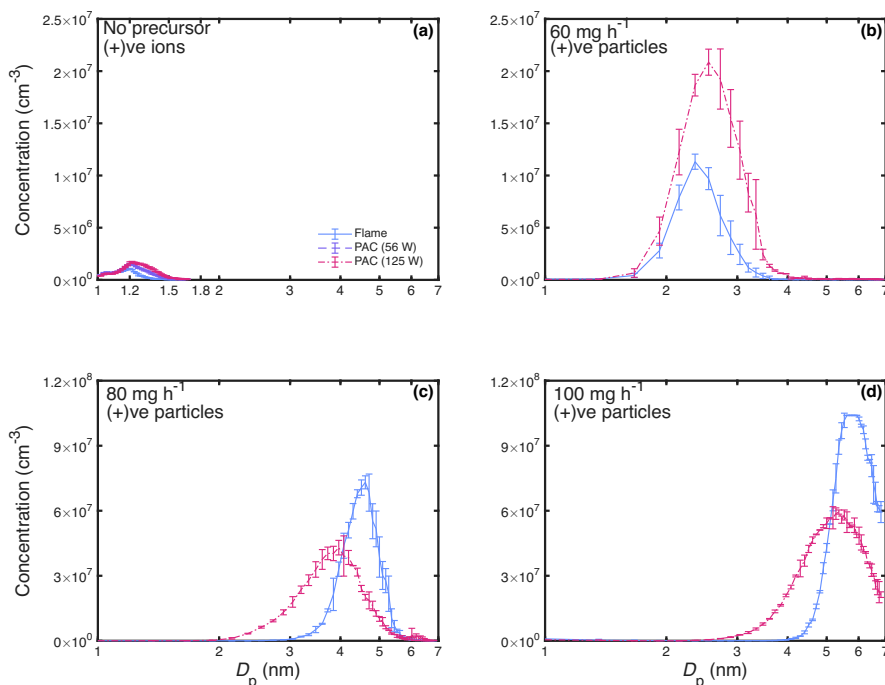

20 **Figure S4:** (a) shows the size distribution of positive ions without precursor, TEOS, addition. (b), (c), and (d) show the size distribution of positively charged Si-containing clusters. The size distributions are shown for TEOS feed rates ranging from of  $60 \text{ mg h}^{-1}$  to  $100 \text{ mg h}^{-1}$ . Each panel compares the influence of corona discharge at power 125 W on the size distribution. Error bars denote the standard deviation. Size distributions showed in this plot are not corrected for charged fraction.

25

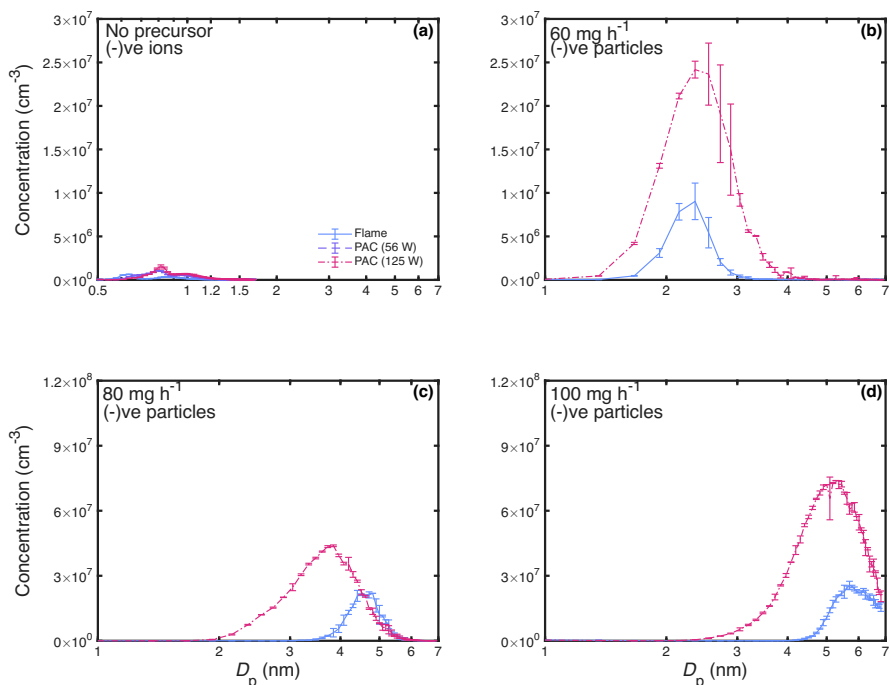

30 **Figure S5:** (a) shows the size distribution of negative ions without precursor, TEOS, addition. Compared to other panels, panel (a) has different x-axis limit. (b), (c), and (d) show the size distribution of negatively charged Si-containing clusters. The size distributions are shown for TEOS feed rates ranging from of 60 mg h<sup>-1</sup> to 100 mg h<sup>-1</sup>. Each panel compares the influence of corona discharge at power 125 W on the size distribution. Error bars denote the standard deviation. Size distributions showed in this plot are not corrected for charged fraction.
